# Supplementary material for: Multivariate analyses of UV-Vis absorption spectral data from cachaça wood extracts: a model to classify aged Brazilian cachaças according to the wood species used
Source: Royal Society of Chemistry journal article supplement (doi:10.1039/c2ay05670d), 2012-01-01
Supplement: c2ay05670d.pdf [file c2ay05670d.pdf]

FIGURE 1S

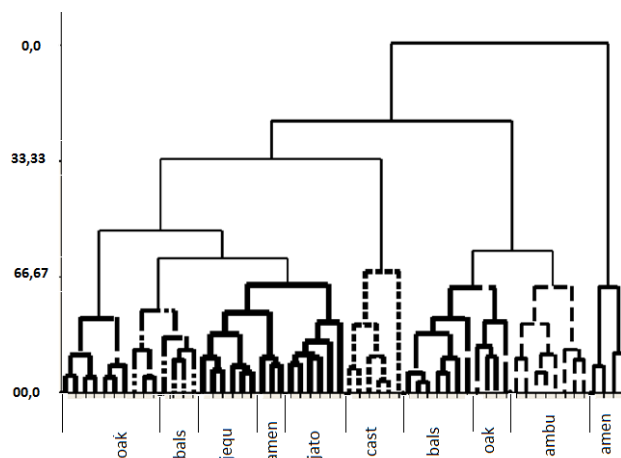

FIGURE 1S. HCA dendrogram plot of cachaça woods extracts using normalized first derivative of spectral absorbance as variables. Similarity measurement: Euclidean distance; data processing: mean-centered; clustering technique: incremental.
